# Supplementary material for: Rising rates of injection drug use associated infective endocarditis in Virginia with missed opportunities for addiction treatment referral: a retrospective cohort study
Source: Springer Nature journal article supplement (doi:10.1186/s12879-018-3408-y), 2018-10-24
Supplement: MOESM1 [file 16222706]

**Additional File 1.** ICD diagnosis codes pertaining to substance abuse, substance abuse counseling and HCV

**ICD-9 and ICD-10 diagnosis codes pertaining to substance abuse, substance abuse counseling and HCV**

V02.6 - VIRAL HEPATITIS CARRIER  
V02.60 - VIRAL HEPATITIS CARRIER UNSPEC  
Z71.5 - DRUG ABUSE COUNSELING AND SURVEILLANCE  
070.7 - VIRAL HEPATITIS C NOS  
B19.2 - UNSPECIFIED VIRAL HEPATITIS C  
B19.21 - UNSPECIFIED VIRAL HEPATITIS C WITH HEPATIC COMA  
B19.20 - UNSPECIFIED VIRAL HEPATITIS C WITHOUT HEPATIC COMA  
V02.69 - OT VIRAL HEPATITIS CARRIER  
B18.2 - CHRONIC VIRAL HEPATITIS C  
V02.62 - HEPATITIS C CARRIER  
B17.10 - ACUTE HEPATITIS C WITHOUT HEPATIC COMA  
Z22.52 - CARRIER OF VIRAL HEPATITIS C  
B17.1 - ACUTE HEPATITIS C  
B17.11 - ACUTE HEPATITIS C WITH HEPATIC COMA  
F16.29 - HALLUCINOGEN DEPENDENCE W UNSP HALLUCINOGEN-INDUCED DISORDER  
F16.283 - HALLUCIGN DEPEND W HALLUCIGN PERSISTING PERCEPTION DISORDER  
F16.288 - HALLUCINOGEN DEPENDENCE W OTH HALLUCINOGEN-INDUCED DISORDER  
F16.280 - HALLUCINOGEN DEPENDENCE W ANXIETY DISORDER  
F16.28 - HALLUCINOGEN DEPENDENCE W OTH HALLUCINOGEN-INDUCED DISORDER  
F16.250 - HALLUCINOGEN DEPENDENCE W PSYCHOTIC DISORDER W DELUSIONS  
F16.259 - HALLUCINOGEN DEPENDENCE W PSYCHOTIC DISORDER, UNSP  
F16.251 - HALLUCINOGEN DEPENDENCE W PSYCHOTIC DISORDER W HALLUCIN  
F16.25 - HALLUCINOGEN DEPENDENCE W PSYCHOTIC DISORDER  
F16.24 - HALLUCINOGEN DEPENDENCE W HALLUCINOGEN-INDUCED MOOD DISORDER  
F16.229 - HALLUCINOGEN DEPENDENCE WITH INTOXICATION, UNSPECIFIED  
F16.221 - HALLUCINOGEN DEPENDENCE WITH INTOXICATION WITH DELIRIUM  
F16.220 - HALLUCINOGEN DEPENDENCE WITH INTOXICATION, UNCOMPLICATED  
F16.22 - HALLUCINOGEN DEPENDENCE WITH INTOXICATION  
F16.21 - HALLUCINOGEN DEPENDENCE, IN REMISSION  
F16.20 - HALLUCINOGEN DEPENDENCE, UNCOMPLICATED  
F16.188 - HALLUCINOGEN ABUSE WITH OTHER HALLUCINOGEN-INDUCED DISORDER  
F16.19 - HALLUCINOGEN ABUSE WITH UNSP HALLUCINOGEN-INDUCED DISORDER  
F16.2 - HALLUCINOGEN DEPENDENCE  
F16.150 - HALLUCINOGEN ABUSE W PSYCHOTIC DISORDER W DELUSIONS  
F16.18 - HALLUCINOGEN ABUSE WITH OTHER HALLUCINOGEN-INDUCED DISORDER  
F16.159 - HALLUCINOGEN ABUSE W PSYCHOTIC DISORDER, UNSP  
F16.180 - HALLUCINOGEN ABUSE W HALLUCINOGEN-INDUCED ANXIETY DISORDER

F16.183 - HALLUCIGN ABUSE W HALLUCIGN PERSISTING PERCEPTION DISORDER  
F16.151 - HALLUCINOGEN ABUSE W PSYCHOTIC DISORDER W HALLUCINATIONS  
F16.15 - HALLUCINOGEN ABUSE W HALLUCINOGEN-INDUCED PSYCHOTIC DISORDER  
F16.14 - HALLUCINOGEN ABUSE WITH HALLUCINOGEN-INDUCED MOOD DISORDER  
F16.122 - HALLUCINOGEN ABUSE W INTOXICATION W PERCEPTUAL DISTURBANCE  
F16.129 - HALLUCINOGEN ABUSE WITH INTOXICATION, UNSPECIFIED  
F16.121 - HALLUCINOGEN ABUSE WITH INTOXICATION WITH DELIRIUM  
F16.120 - HALLUCINOGEN ABUSE WITH INTOXICATION, UNCOMPLICATED  
F16.12 - HALLUCINOGEN ABUSE WITH INTOXICATION  
F16.1 - HALLUCINOGEN ABUSE  
F15.988 - OTH STIMULANT USE, UNSP WITH OTH STIMULANT-INDUCED DISORDER  
F15.99 - OTH STIMULANT USE, UNSP WITH UNSP STIMULANT-INDUCED DISORDER  
F16.10 - HALLUCINOGEN ABUSE, UNCOMPLICATED  
F15.982 - OTH STIMULANT USE, UNSP W STIMULANT-INDUCED SLEEP DISORDER  
F15.981 - OTH STIMULANT USE, UNSP W STIM-INDUCE SEXUAL DYSFUNCTION  
F15.98 - OTH STIMULANT USE, UNSP WITH OTH STIMULANT-INDUCED DISORDER  
F15.959 - OTH STIMULANT USE, UNSP W STIM-INDUCE PSYCH DISORDER, UNSP  
F15.980 - OTH STIMULANT USE, UNSP W STIMULANT-INDUCED ANXIETY DISORDER  
F15.951 - OTH STIM USE, UNSP W STIM-INDUCE PSYCH DISORDER W HALLUCIN  
F15.950 - OTH STIM USE, UNSP W STIM-INDUCE PSYCH DISORDER W DELUSIONS  
F15.93 - OTHER STIMULANT USE, UNSPECIFIED WITH WITHDRAWAL  
F15.94 - OTH STIMULANT USE, UNSP WITH STIMULANT-INDUCED MOOD DISORDER  
F15.95 - OTH STIMULANT USE, UNSP W STIM-INDUCE PSYCHOTIC DISORDER  
F15.922 - OTH STIMULANT USE, UNSP W INTOX W PERCEPTUAL DISTURBANCE  
F15.929 - OTHER STIMULANT USE, UNSP WITH INTOXICATION, UNSPECIFIED  
F15.921 - OTHER STIMULANT USE, UNSPECIFIED WITH INTOXICATION DELIRIUM  
F15.920 - OTHER STIMULANT USE, UNSP WITH INTOXICATION, UNCOMPLICATED  
F15.9 - OTHER STIMULANT USE, UNSPECIFIED  
F15.92 - OTHER STIMULANT USE, UNSPECIFIED WITH INTOXICATION  
F15.90 - OTHER STIMULANT USE, UNSPECIFIED, UNCOMPLICATED  
F15.29 - OTH STIMULANT DEPENDENCE W UNSP STIMULANT-INDUCED DISORDER  
F15.282 - OTH STIMULANT DEPENDENCE W STIMULANT-INDUCED SLEEP DISORDER  
F15.288 - OTH STIMULANT DEPENDENCE WITH OTH STIMULANT-INDUCED DISORDER  
F15.281 - OTH STIMULANT DEPENDENCE W STIM-INDUCE SEXUAL DYSFUNCTION  
F15.280 - OTH STIMULANT DEPENDENCE W STIM-INDUCE ANXIETY DISORDER  
F15.28 - OTH STIMULANT DEPENDENCE WITH OTH STIMULANT-INDUCED DISORDER  
F15.251 - OTH STIMULANT DEPEND W STIM-INDUCE PSYCH DISORDER W HALLUCIN  
F15.259 - OTH STIMULANT DEPEND W STIM-INDUCE PSYCHOTIC DISORDER, UNSP  
F15.25 - OTH STIMULANT DEPENDENCE W STIM-INDUCE PSYCHOTIC DISORDER  
F15.250 - OTH STIM DEPEND W STIM-INDUCE PSYCH DISORDER W DELUSIONS  
F15.24 - OTH STIMULANT DEPENDENCE W STIMULANT-INDUCED MOOD DISORDER

F15.23 - OTHER STIMULANT DEPENDENCE WITH WITHDRAWAL  
F15.229 - OTHER STIMULANT DEPENDENCE WITH INTOXICATION, UNSPECIFIED  
F15.222 - OTH STIMULANT DEPENDENCE W INTOX W PERCEPTUAL DISTURBANCE  
F15.221 - OTHER STIMULANT DEPENDENCE WITH INTOXICATION DELIRIUM  
F15.220 - OTHER STIMULANT DEPENDENCE WITH INTOXICATION, UNCOMPLICATED  
F15.22 - OTHER STIMULANT DEPENDENCE WITH INTOXICATION  
F15.21 - OTHER STIMULANT DEPENDENCE, IN REMISSION  
F15.20 - OTHER STIMULANT DEPENDENCE, UNCOMPLICATED  
F15.2 - OTHER STIMULANT DEPENDENCE  
F15.19 - OTHER STIMULANT ABUSE WITH UNSP STIMULANT-INDUCED DISORDER  
F15.182 - OTHER STIMULANT ABUSE WITH STIMULANT-INDUCED SLEEP DISORDER  
F15.188 - OTHER STIMULANT ABUSE WITH OTHER STIMULANT-INDUCED DISORDER  
F15.181 - OTH STIMULANT ABUSE W STIMULANT-INDUCED SEXUAL DYSFUNCTION  
F15.180 - OTH STIMULANT ABUSE WITH STIMULANT-INDUCED ANXIETY DISORDER  
F15.159 - OTH STIMULANT ABUSE W STIM-INDUCE PSYCHOTIC DISORDER, UNSP  
F15.18 - OTHER STIMULANT ABUSE WITH OTHER STIMULANT-INDUCED DISORDER  
F15.151 - OTH STIMULANT ABUSE W STIM-INDUCE PSYCH DISORDER W HALLUCIN  
F15.150 - OTH STIMULANT ABUSE W STIM-INDUCE PSYCH DISORDER W DELUSIONS  
F15.15 - OTH STIMULANT ABUSE W STIMULANT-INDUCED PSYCHOTIC DISORDER  
F15.14 - OTHER STIMULANT ABUSE WITH STIMULANT-INDUCED MOOD DISORDER  
F15.129 - OTHER STIMULANT ABUSE WITH INTOXICATION, UNSPECIFIED  
F15.122 - OTH STIMULANT ABUSE W INTOXICATION W PERCEPTUAL DISTURBANCE  
F15.121 - OTHER STIMULANT ABUSE WITH INTOXICATION DELIRIUM  
F15.120 - OTHER STIMULANT ABUSE WITH INTOXICATION, UNCOMPLICATED  
F15.12 - OTHER STIMULANT ABUSE WITH INTOXICATION  
F15.10 - OTHER STIMULANT ABUSE, UNCOMPLICATED  
F15.1 - OTHER STIMULANT ABUSE  
F14.99 - COCAINE USE, UNSP WITH UNSPECIFIED COCAINE-INDUCED DISORDER  
F14.988 - COCAINE USE, UNSPECIFIED WITH OTHER COCAINE-INDUCED DISORDER  
F14.982 - COCAINE USE, UNSPECIFIED WITH COCAINE-INDUCED SLEEP DISORDER  
F14.981 - COCAINE USE, UNSP WITH COCAINE-INDUCED SEXUAL DYSFUNCTION  
F14.980 - COCAINE USE, UNSP WITH COCAINE-INDUCED ANXIETY DISORDER  
F14.98 - COCAINE USE, UNSPECIFIED WITH OTH COCAINE-INDUCED DISORDER  
F14.959 - COCAINE USE, UNSP W COCAINE-INDUCED PSYCHOTIC DISORDER, UNSP  
F14.951 - COCAINE USE, UNSP W COCAINE-INDUC PSYCH DISORDER W HALLUCIN  
F14.950 - COCAINE USE, UNSP W COCAINE-INDUC PSYCH DISORDER W DELUSIONS  
F14.95 - COCAINE USE, UNSP WITH COCAINE-INDUCED PSYCHOTIC DISORDER  
F14.94 - COCAINE USE, UNSPECIFIED WITH COCAINE-INDUCED MOOD DISORDER  
F14.929 - COCAINE USE, UNSPECIFIED WITH INTOXICATION, UNSPECIFIED  
F14.922 - COCAINE USE, UNSP W INTOXICATION WITH PERCEPTUAL DISTURBANCE  
F14.921 - COCAINE USE, UNSPECIFIED WITH INTOXICATION DELIRIUM

F14.920 - COCAINE USE, UNSPECIFIED WITH INTOXICATION, UNCOMPLICATED  
F14.92 - COCAINE USE, UNSPECIFIED WITH INTOXICATION  
F14.90 - COCAINE USE, UNSPECIFIED, UNCOMPLICATED  
F14.9 - COCAINE USE, UNSPECIFIED  
F14.29 - COCAINE DEPENDENCE WITH UNSPECIFIED COCAINE-INDUCED DISORDER  
F14.288 - COCAINE DEPENDENCE WITH OTHER COCAINE-INDUCED DISORDER  
F14.282 - COCAINE DEPENDENCE WITH COCAINE-INDUCED SLEEP DISORDER  
F14.281 - COCAINE DEPENDENCE WITH COCAINE-INDUCED SEXUAL DYSFUNCTION  
F14.280 - COCAINE DEPENDENCE WITH COCAINE-INDUCED ANXIETY DISORDER  
F14.28 - COCAINE DEPENDENCE WITH OTHER COCAINE-INDUCED DISORDER  
F14.259 - COCAINE DEPENDENCE W COCAINE-INDUC PSYCHOTIC DISORDER, UNSP  
F14.251 - COCAINE DEPEND W COCAINE-INDUC PSYCHOTIC DISORDER W HALLUCIN  
F14.250 - COCAINE DEPEND W COCAINE-INDUC PSYCH DISORDER W DELUSIONS  
F14.25 - COCAINE DEPENDENCE WITH COCAINE-INDUCED PSYCHOTIC DISORDER  
F14.24 - COCAINE DEPENDENCE WITH COCAINE-INDUCED MOOD DISORDER  
F14.23 - COCAINE DEPENDENCE WITH WITHDRAWAL  
F14.229 - COCAINE DEPENDENCE WITH INTOXICATION, UNSPECIFIED  
F14.222 - COCAINE DEPENDENCE W INTOXICATION W PERCEPTUAL DISTURBANCE  
F14.221 - COCAINE DEPENDENCE WITH INTOXICATION DELIRIUM  
F14.220 - COCAINE DEPENDENCE WITH INTOXICATION, UNCOMPLICATED  
F14.22 - COCAINE DEPENDENCE WITH INTOXICATION  
F14.2 - COCAINE DEPENDENCE  
F14.20 - COCAINE DEPENDENCE, UNCOMPLICATED  
F14.21 - COCAINE DEPENDENCE, IN REMISSION  
F14.188 - COCAINE ABUSE WITH OTHER COCAINE-INDUCED DISORDER  
F14.19 - COCAINE ABUSE WITH UNSPECIFIED COCAINE-INDUCED DISORDER  
F14.182 - COCAINE ABUSE WITH COCAINE-INDUCED SLEEP DISORDER  
F14.181 - COCAINE ABUSE WITH COCAINE-INDUCED SEXUAL DYSFUNCTION  
F14.180 - COCAINE ABUSE WITH COCAINE-INDUCED ANXIETY DISORDER  
F14.18 - COCAINE ABUSE WITH OTHER COCAINE-INDUCED DISORDER  
F14.159 - COCAINE ABUSE WITH COCAINE-INDUCED PSYCHOTIC DISORDER, UNSP  
F14.151 - COCAINE ABUSE W COCAINE-INDUC PSYCHOTIC DISORDER W HALLUCIN  
F14.150 - COCAINE ABUSE W COCAINE-INDUC PSYCHOTIC DISORDER W DELUSIONS  
F14.15 - COCAINE ABUSE WITH COCAINE-INDUCED PSYCHOTIC DISORDER  
F14.14 - COCAINE ABUSE WITH COCAINE-INDUCED MOOD DISORDER  
F14.129 - COCAINE ABUSE WITH INTOXICATION, UNSPECIFIED  
F14.122 - COCAINE ABUSE WITH INTOXICATION WITH PERCEPTUAL DISTURBANCE  
F14.121 - COCAINE ABUSE WITH INTOXICATION WITH DELIRIUM  
F14.120 - COCAINE ABUSE WITH INTOXICATION, UNCOMPLICATED  
F14.10 - COCAINE ABUSE, UNCOMPLICATED  
F14.12 - COCAINE ABUSE WITH INTOXICATION

F14.1 - COCAINE ABUSE

F13.99 - SEDATIVE, HYPNOTIC OR ANXIOLYTIC USE, UNSP W UNSP DISORDER  
F13.982 - SEDATIVE, HYPNOTIC OR ANXIOLYTIC USE, UNSP W SLEEP DISORDER  
F13.981 - SEDATV/HYP/ANXIOLYTIC USE, UNSP W SEXUAL DYSFUNCTION  
F13.988 - SEDATIVE, HYPNOTIC OR ANXIOLYTIC USE, UNSP W OTH DISORDER  
F13.980 - SEDATV/HYP/ANXIOLYTIC USE, UNSP W ANXIETY DISORDER  
F13.98 - SEDATIVE, HYPNOTIC OR ANXIOLYTIC USE, UNSP W OTH DISORDERS  
F13.97 - SEDATV/HYP/ANXIOLYTIC USE, UNSP W PERSISTING DEMENTIA  
F13.96 - SEDATV/HYP/ANXIOLYTIC USE, UNSP W PERSIST AMNESTIC DISORDER  
F13.959 - SEDATV/HYP/ANXIOLYTIC USE, UNSP W PSYCHOTIC DISORDER, UNSP  
F13.951 - SEDATV/HYP/ANXIOLYTIC USE, UNSP W PSYCH DISORDER W HALLUCIN  
F13.95 - SEDATV/HYP/ANXIOLYTIC USE, UNSP W PSYCHOTIC DISORDER  
F13.950 - SEDATV/HYP/ANXIOLYTIC USE, UNSP W PSYCH DISORDER W DELUSIONS  
F13.94 - SEDATIVE, HYPNOTIC OR ANXIOLYTIC USE, UNSP W MOOD DISORDER  
F13.931 - SEDATV/HYP/ANXIOLYTIC USE, UNSP W WITHDRAWAL DELIRIUM  
F13.932 - SEDATV/HYP/ANXIOLYTIC USE, UNSP W W/DRAWAL W PERCEPTL DISTURB  
F13.939 - SEDATV/HYP/ANXIOLYTIC USE, UNSP W WITHDRAWAL, UNSP  
F13.930 - SEDATV/HYP/ANXIOLYTIC USE, UNSP W WITHDRAWAL, UNCOMPLICATED  
F13.93 - SEDATIVE, HYPNOTIC OR ANXIOLYTIC USE, UNSP WITH WITHDRAWAL  
F13.921 - SEDATV/HYP/ANXIOLYTIC USE, UNSP W INTOXICATION DELIRIUM  
F13.929 - SEDATV/HYP/ANXIOLYTIC USE, UNSP W INTOXICATION, UNSP  
F13.920 - SEDATV/HYP/ANXIOLYTIC USE, UNSP W INTOXICATION, UNCOMPLICATED  
F13.92 - SEDATIVE, HYPNOTIC OR ANXIOLYTIC USE, UNSP WITH INTOXICATION  
F13.9 - SEDATIVE, HYPNOTIC OR ANXIOLYTIC-RELATED USE, UNSPECIFIED  
F13.90 - SEDATIVE, HYPNOTIC, OR ANXIOLYTIC USE, UNSP, UNCOMPLICATED  
F13.29 - SEDATIVE, HYPNOTIC OR ANXIOLYTIC DEPENDENCE W UNSP DISORDER  
F13.288 - SEDATIVE, HYPNOTIC OR ANXIOLYTIC DEPENDENCE W OTH DISORDER  
F13.282 - SEDATIVE, HYPNOTIC OR ANXIOLYTIC DEPENDENCE W SLEEP DISORDER  
F13.281 - SEDATV/HYP/ANXIOLYTIC DEPENDENCE W SEXUAL DYSFUNCTION  
F13.28 - SEDATIVE, HYPNOTIC OR ANXIOLYTIC DEPENDENCE W OTH DISORDERS  
F13.280 - SEDATV/HYP/ANXIOLYTIC DEPENDENCE W ANXIETY DISORDER  
F13.26 - SEDATV/HYP/ANXIOLYTIC DEPEND W PERSISTING AMNESTIC DISORDER  
F13.27 - SEDATV/HYP/ANXIOLYTIC DEPENDENCE W PERSISTING DEMENTIA  
F13.259 - SEDATV/HYP/ANXIOLYTIC DEPENDENCE W PSYCHOTIC DISORDER, UNSP  
F13.250 - SEDATV/HYP/ANXIOLYTIC DEPEND W PSYCHOTIC DISORDER W DELUSIONS  
F13.251 - SEDATV/HYP/ANXIOLYTIC DEPEND W PSYCHOTIC DISORDER W HALLUCIN  
F13.25 - SEDATV/HYP/ANXIOLYTIC DEPENDENCE W PSYCHOTIC DISORDER  
F13.24 - SEDATIVE, HYPNOTIC OR ANXIOLYTIC DEPENDENCE W MOOD DISORDER  
F13.239 - SEDATV/HYP/ANXIOLYTIC DEPENDENCE W WITHDRAWAL, UNSP  
F13.231 - SEDATV/HYP/ANXIOLYTIC DEPENDENCE W WITHDRAWAL DELIRIUM  
F13.232 - SEDATV/HYP/ANXIOLYTIC DEPEND W W/DRAWAL W PERCEPTUAL DISTURB

F13.230 - SEDATIVE/HYPNOTIC/ANXIOLYTIC DEPENDENCE WITH WITHDRAWAL, UNCOMPLICATED  
F13.23 - SEDATIVE, HYPNOTIC OR ANXIOLYTIC DEPENDENCE WITH WITHDRAWAL  
F13.229 - SEDATIVE/HYPNOTIC/ANXIOLYTIC DEPENDENCE WITH INTOXICATION, UNSPECIFIED  
F13.220 - SEDATIVE/HYPNOTIC/ANXIOLYTIC DEPENDENCE WITH INTOXICATION, UNCOMPLICATED  
F13.221 - SEDATIVE/HYPNOTIC/ANXIOLYTIC DEPENDENCE WITH INTOXICATION DELIRIUM  
F13.22 - SEDATIVE, HYPNOTIC OR ANXIOLYTIC DEPENDENCE WITH INTOXICATION  
F13.21 - SEDATIVE, HYPNOTIC OR ANXIOLYTIC DEPENDENCE, IN REMISSION  
F13.19 - SEDATIVE, HYPNOTIC OR ANXIOLYTIC ABUSE WITH UNSPECIFIED DISORDER  
F13.20 - SEDATIVE, HYPNOTIC OR ANXIOLYTIC DEPENDENCE, UNCOMPLICATED  
F13.188 - SEDATIVE, HYPNOTIC OR ANXIOLYTIC ABUSE WITH OTHER DISORDER  
F13.2 - SEDATIVE, HYPNOTIC OR ANXIOLYTIC-RELATED DEPENDENCE  
F13.182 - SEDATIVE, HYPNOTIC OR ANXIOLYTIC ABUSE WITH SLEEP DISORDER  
F13.181 - SEDATIVE, HYPNOTIC OR ANXIOLYTIC ABUSE WITH SEXUAL DYSFUNCTION  
F13.180 - SEDATIVE, HYPNOTIC OR ANXIOLYTIC ABUSE WITH ANXIETY DISORDER  
F13.18 - SEDATIVE, HYPNOTIC OR ANXIOLYTIC ABUSE WITH OTHER DISORDERS  
F13.159 - SEDATIVE/HYPNOTIC/ANXIOLYTIC ABUSE WITH PSYCHOTIC DISORDER, UNSPECIFIED  
F13.151 - SEDATIVE/HYPNOTIC/ANXIOLYTIC ABUSE WITH PSYCHOTIC DISORDER WITH HALLUCINATIONS  
F13.150 - SEDATIVE/HYPNOTIC/ANXIOLYTIC ABUSE WITH PSYCHOTIC DISORDER WITH DELUSIONS  
F13.14 - SEDATIVE, HYPNOTIC OR ANXIOLYTIC ABUSE WITH MOOD DISORDER  
F13.15 - SEDATIVE, HYPNOTIC OR ANXIOLYTIC ABUSE WITH PSYCHOTIC DISORDER  
F13.129 - SEDATIVE, HYPNOTIC OR ANXIOLYTIC ABUSE WITH INTOXICATION, UNSPECIFIED  
F13.121 - SEDATIVE/HYPNOTIC/ANXIOLYTIC ABUSE WITH INTOXICATION DELIRIUM  
F13.120 - SEDATIVE/HYPNOTIC/ANXIOLYTIC ABUSE WITH INTOXICATION, UNCOMPLICATED  
F13.12 - SEDATIVE, HYPNOTIC OR ANXIOLYTIC ABUSE WITH INTOXICATION  
F13.10 - SEDATIVE, HYPNOTIC OR ANXIOLYTIC ABUSE, UNCOMPLICATED  
F13.1 - SEDATIVE, HYPNOTIC OR ANXIOLYTIC-RELATED ABUSE  
F11.99 - OPIOID USE, UNSPECIFIED WITH UNSPECIFIED OPIOID-INDUCED DISORDER  
F11.988 - OPIOID USE, UNSPECIFIED WITH OTHER OPIOID-INDUCED DISORDER  
F11.982 - OPIOID USE, UNSPECIFIED WITH OPIOID-INDUCED SLEEP DISORDER  
F11.981 - OPIOID USE, UNSPECIFIED WITH OPIOID-INDUCED SEXUAL DYSFUNCTION  
F11.951 - OPIOID USE, UNSPECIFIED WITH OPIOID-INDUCED PSYCHOTIC DISORDER WITH HALLUCINATIONS  
F11.98 - OPIOID USE, UNSPECIFIED WITH OTHER OPIOID-INDUCED DISORDER  
F11.959 - OPIOID USE, UNSPECIFIED WITH OPIOID-INDUCED PSYCHOTIC DISORDER, UNSPECIFIED  
F11.950 - OPIOID USE, UNSPECIFIED WITH OPIOID-INDUCED PSYCHOTIC DISORDER WITH DELUSIONS  
F11.95 - OPIOID USE, UNSPECIFIED WITH OPIOID-INDUCED PSYCHOTIC DISORDER  
F11.94 - OPIOID USE, UNSPECIFIED WITH OPIOID-INDUCED MOOD DISORDER  
F11.93 - OPIOID USE, UNSPECIFIED WITH WITHDRAWAL  
F11.922 - OPIOID USE, UNSPECIFIED WITH INTOXICATION WITH PERCEPTUAL DISTURBANCE  
F11.929 - OPIOID USE, UNSPECIFIED WITH INTOXICATION, UNSPECIFIED  
F11.92 - OPIOID USE, UNSPECIFIED WITH INTOXICATION  
F11.920 - OPIOID USE, UNSPECIFIED WITH INTOXICATION, UNCOMPLICATED

F11.921 - OPIOID USE, UNSPECIFIED WITH INTOXICATION DELIRIUM  
F11.90 - OPIOID USE, UNSPECIFIED, UNCOMPLICATED  
F11.29 - OPIOID DEPENDENCE WITH UNSPECIFIED OPIOID-INDUCED DISORDER  
F11.9 - OPIOID USE, UNSPECIFIED  
F11.282 - OPIOID DEPENDENCE WITH OPIOID-INDUCED SLEEP DISORDER  
F11.288 - OPIOID DEPENDENCE WITH OTHER OPIOID-INDUCED DISORDER  
F11.281 - OPIOID DEPENDENCE WITH OPIOID-INDUCED SEXUAL DYSFUNCTION  
F11.28 - OPIOID DEPENDENCE WITH OTHER OPIOID-INDUCED DISORDER  
F11.251 - OPIOID DEPEND W OPIOID-INDUC PSYCHOTIC DISORDER W HALLUCIN  
F11.259 - OPIOID DEPENDENCE W OPIOID-INDUCED PSYCHOTIC DISORDER, UNSP  
F11.25 - OPIOID DEPENDENCE WITH OPIOID-INDUCED PSYCHOTIC DISORDER  
F11.250 - OPIOID DEPEND W OPIOID-INDUC PSYCHOTIC DISORDER W DELUSIONS  
F11.24 - OPIOID DEPENDENCE WITH OPIOID-INDUCED MOOD DISORDER  
F11.23 - OPIOID DEPENDENCE WITH WITHDRAWAL  
F11.229 - OPIOID DEPENDENCE WITH INTOXICATION, UNSPECIFIED  
F11.222 - OPIOID DEPENDENCE W INTOXICATION WITH PERCEPTUAL DISTURBANCE  
F11.221 - OPIOID DEPENDENCE WITH INTOXICATION DELIRIUM  
F11.220 - OPIOID DEPENDENCE WITH INTOXICATION, UNCOMPLICATED  
F11.20 - OPIOID DEPENDENCE, UNCOMPLICATED  
F11.22 - OPIOID DEPENDENCE WITH INTOXICATION  
F11.21 - OPIOID DEPENDENCE, IN REMISSION  
F11.19 - OPIOID ABUSE WITH UNSPECIFIED OPIOID-INDUCED DISORDER  
F11.2 - OPIOID DEPENDENCE  
F11.188 - OPIOID ABUSE WITH OTHER OPIOID-INDUCED DISORDER  
F11.182 - OPIOID ABUSE WITH OPIOID-INDUCED SLEEP DISORDER  
F11.181 - OPIOID ABUSE WITH OPIOID-INDUCED SEXUAL DYSFUNCTION  
F11.18 - OPIOID ABUSE WITH OTHER OPIOID-INDUCED DISORDER  
F11.159 - OPIOID ABUSE WITH OPIOID-INDUCED PSYCHOTIC DISORDER, UNSP  
F11.150 - OPIOID ABUSE W OPIOID-INDUCED PSYCHOTIC DISORDER W DELUSIONS  
F11.151 - OPIOID ABUSE W OPIOID-INDUCED PSYCHOTIC DISORDER W HALLUCIN  
F11.129 - OPIOID ABUSE WITH INTOXICATION, UNSPECIFIED  
F11.14 - OPIOID ABUSE WITH OPIOID-INDUCED MOOD DISORDER  
F11.15 - OPIOID ABUSE WITH OPIOID-INDUCED PSYCHOTIC DISORDER  
F11.122 - OPIOID ABUSE WITH INTOXICATION WITH PERCEPTUAL DISTURBANCE  
F11.121 - OPIOID ABUSE WITH INTOXICATION DELIRIUM  
F11.12 - OPIOID ABUSE WITH INTOXICATION  
F11.1 - OPIOID ABUSE  
F11.120 - OPIOID ABUSE WITH INTOXICATION, UNCOMPLICATED  
305.9 - DRUG ABUSE NEC & NOS  
305.7 - AMPHETAMINE ABUSE  
F11.10 - OPIOID ABUSE, UNCOMPLICATED

305.8 - ANTIDEPRESSANT ABUSE  
305.6 - COCAINE ABUSE  
305.5 - OPIOID ABUSE  
305.4 - SEDATIVE/HYPNOTIC ABUSE  
305.3 - HALLUCINOGEN ABUSE  
304.9 - DRUG DEPENDENCE NOS  
304.8 - COMB DRUG DEPENDENCE NEC  
304.5 - HALLUCINOGEN DEPENDENCE  
304.7 - OPIOID/OTHER DRUG DEP  
304.2 - COCAINE DEPENDENCE  
304.6 - DRUG DEPENDENCE NEC  
304.1 - SEDATIVE/HYPNOTIC DEPEND  
304.4 - AMPHETAMINE DEPENDENCE  
648.34 - DRUG DEPENDENCE-POSTPART  
648.32 - DRUG DEPENDEN-DEL W P/P  
648.31 - DRUG DEPENDENCE-DELIVER  
648.33 - DRUG DEPENDENCE-ANTEPART  
305.93 - DRUG ABUSE NEC-IN REMISS  
648.30 - DRUG DEPEND PREG-UNSPEC  
305.92 - DRUG ABUSE NEC-EPISODIC  
305.91 - DRUG ABUSE NEC-CONTIN  
305.90 - DRUG ABUSE NEC-UNSPEC  
305.83 - ANTIDEPRESS ABUSE-REMISS  
305.81 - ANTIDEPRESS ABUSE-CONTIN  
305.82 - ANTIDEPRESS ABUSE-EPISOD  
305.80 - ANTIDEPRESS ABUSE-UNSPEC  
305.72 - AMPHETAMINE ABUSE-EPISOD  
305.73 - AMPHETAMINE ABUSE-REMISS  
305.71 - AMPHETAMINE ABUSE-CONTIN  
305.63 - COCAINE ABUSE-IN REMISS  
305.70 - AMPHETAMINE ABUSE-UNSPEC  
305.61 - COCAINE ABUSE-CONTINUOUS  
305.62 - COCAINE ABUSE-EPISODIC  
305.60 - COCAINE ABUSE-UNSPEC  
305.53 - OPIOID ABUSE-IN REMISS  
305.52 - OPIOID ABUSE-EPISODIC  
305.51 - OPIOID ABUSE-CONTINUOUS  
305.50 - OPIOID ABUSE-UNSPEC  
305.42 - BARBITURATE ABUSE-EPISOD  
305.43 - BARBITURATE ABUSE-REMISS  
305.41 - BARBITURATE ABUSE-CONTIN



305.40 - BARBITURATE ABUSE-UNSPEC  
305.33 - HALLUCINOGEN ABUSE-REMISS  
305.31 - HALLUCINOGEN ABUSE-CONTIN  
305.32 - HALLUCINOGEN ABUSE-EPISOD  
305.30 - HALLUCINOGEN ABUSE-UNSPEC  
304.92 - DRUG DEPEND NOS-EPISODIC  
304.93 - DRUG DEPEND NOS-REMISS  
304.90 - DRUG DEPEND NOS-UNSPEC  
304.91 - DRUG DEPEND NOS-CONTIN  
304.83 - COMB DRUG DEP NEC-REMISS  
304.82 - COMB DRUG DEP NEC-EPISOD  
304.81 - COMB DRUG DEP NEC-CONTIN  
304.80 - COMB DRUG DEP NEC-UNSPEC  
304.73 - OPIOID/OTHER DEP-REMISS  
304.72 - OPIOID/OTHER DEP-EPISOD  
304.70 - OPIOID/OTHER DEP-UNSPEC  
304.71 - OPIOID/OTHER DEP-CONTIN  
304.63 - DRUG DEPEND NEC-IN REM  
304.61 - DRUG DEPEND NEC-CONTIN  
304.60 - DRUG DEPEND NEC-UNSPEC  
304.62 - DRUG DEPEND NEC-EPISODIC  
304.53 - HALLUCINOGEN DEP-REMISS  
304.51 - HALLUCINOGEN DEP-CONTIN  
304.52 - HALLUCINOGEN DEP-EPISOD  
304.50 - HALLUCINOGEN DEP-UNSPEC  
304.43 - AMPHETAMINE DEPEND-REMISS  
304.41 - AMPHETAMINE DEPEND-CONTIN  
304.40 - AMPHETAMINE DEPEND-UNSPEC  
304.42 - AMPHETAMINE DEPEND-EPISOD  
304.23 - COCAINE DEPEND-REMISS  
304.21 - COCAINE DEPEND-CONTIN  
304.20 - COCAINE DEPEND-UNSPEC  
304.22 - COCAINE DEPEND-EPISODIC  
304.13 - BARBITURATE DEPEND-REMISS  
304.12 - BARBITURATE DEPEND-EPISOD  
304.03 - OPIOID DEPENDENCE-REMISS  
304.11 - BARBITURATE DEPEND-CONTIN  
304.10 - BARBITURATE DEPEND-UNSPEC  
292.0 - DRUG WITHDRAWAL SYNDROME  
304.01 - OPIOID DEPENDENCE-CONTIN  
304.00 - OPIOID DEPENDENCE-UNSPEC

304.02 - OPIOID DEPENDENCE-EPIBOD

F19.980 - OTH PSYCHOACTIVE SUBSTANCE USE, UNSP W ANXIETY DISORDER  
F19.982 - OTH PSYCHOACTIVE SUBSTANCE USE, UNSP W SLEEP DISORDER  
F19.981 - OTH PSYCHOACTIVE SUBSTANCE USE, UNSP W SEXUAL DYSFUNCTION  
F19.98 - OTH PSYCHOACTIVE SUBSTANCE USE, UNSP W OTH DISORDERS  
F19.97 - OTH PSYCHOACTIVE SUBSTANCE USE, UNSP W PERSISTING DEMENTIA  
F19.96 - OTH PSYCHOACTV SUB USE, UNSP W PERSIST AMNESTIC DISORDER  
F19.959 - OTH PSYCHOACTV SUBSTANCE USE, UNSP W PSYCH DISORDER, UNSP  
F19.951 - OTH PSYCHOACTV SUB USE, UNSP W PSYCH DISORDER W HALLUCIN  
F19.950 - OTH PSYCHOACTV SUB USE, UNSP W PSYCH DISORDER W DELUSIONS  
F19.939 - OTHER PSYCHOACTIVE SUBSTANCE USE, UNSP WITH WITHDRAWAL, UNSP  
F19.95 - OTH PSYCHOACTIVE SUBSTANCE USE, UNSP W PSYCHOTIC DISORDER  
F19.94 - OTH PSYCHOACTIVE SUBSTANCE USE, UNSP W MOOD DISORDER  
F19.932 - OTH PSYCHOACTV SUB USE, UNSP W W/DRAWAL W PERCEPTL DISTURB  
F19.931 - OTH PSYCHOACTIVE SUBSTANCE USE, UNSP W WITHDRAWAL DELIRIUM  
F19.93 - OTHER PSYCHOACTIVE SUBSTANCE USE, UNSP WITH WITHDRAWAL  
F19.930 - OTH PSYCHOACTIVE SUBSTANCE USE, UNSP W WITHDRAWAL, UNCOMP  
F19.929 - OTH PSYCHOACTIVE SUBSTANCE USE, UNSP WITH INTOXICATION, UNSP  
F19.921 - OTH PSYCHOACTIVE SUBSTANCE USE, UNSP W INTOX W DELIRIUM  
F19.922 - OTH PSYCHOACTV SUB USE, UNSP W INTOX W PERCEPTL DISTURB  
F19.92 - OTHER PSYCHOACTIVE SUBSTANCE USE, UNSP WITH INTOXICATION  
F19.920 - OTH PSYCHOACTIVE SUBSTANCE USE, UNSP W INTOXICATION, UNCOMP  
F19.9 - OTHER PSYCHOACTIVE SUBSTANCE USE, UNSPECIFIED  
F19.90 - OTHER PSYCHOACTIVE SUBSTANCE USE, UNSPECIFIED, UNCOMPLICATED  
F19.29 - OTH PSYCHOACTIVE SUBSTANCE DEPENDENCE W UNSP DISORDER  
F19.282 - OTH PSYCHOACTIVE SUBSTANCE DEPENDENCE W SLEEP DISORDER  
F19.288 - OTH PSYCHOACTIVE SUBSTANCE DEPENDENCE W OTH DISORDER  
F19.280 - OTH PSYCHOACTIVE SUBSTANCE DEPENDENCE W ANXIETY DISORDER  
F19.281 - OTH PSYCHOACTIVE SUBSTANCE DEPENDENCE W SEXUAL DYSFUNCTION  
F19.28 - OTH PSYCHOACTIVE SUBSTANCE DEPENDENCE W OTH DISORDERS  
F19.251 - OTH PSYCHOACTV SUBSTANCE DEPEND W PSYCH DISORDER W HALLUCIN  
F19.26 - OTH PSYCHOACTV SUBSTANCE DEPEND W PERSIST AMNESTIC DISORDER  
F19.27 - OTH PSYCHOACTIVE SUBSTANCE DEPENDENCE W PERSISTING DEMENTIA  
F19.250 - OTH PSYCHOACTV SUBSTANCE DEPEND W PSYCH DISORDER W DELUSIONS  
F19.259 - OTH PSYCHOACTV SUBSTANCE DEPEND W PSYCHOTIC DISORDER, UNSP  
F19.24 - OTH PSYCHOACTIVE SUBSTANCE DEPENDENCE W MOOD DISORDER  
F19.25 - OTH PSYCHOACTIVE SUBSTANCE DEPENDENCE W PSYCHOTIC DISORDER  
F19.239 - OTH PSYCHOACTIVE SUBSTANCE DEPENDENCE WITH WITHDRAWAL, UNSP  
F19.231 - OTH PSYCHOACTIVE SUBSTANCE DEPENDENCE W WITHDRAWAL DELIRIUM  
F19.232 - OTH PSYCHOACTV SUB DEPEND W W/DRAWAL W PERCEPTL DISTURB  
F19.230 - OTH PSYCHOACTIVE SUBSTANCE DEPENDENCE W WITHDRAWAL, UNCOMP

F19.23 - OTHER PSYCHOACTIVE SUBSTANCE DEPENDENCE WITH WITHDRAWAL  
F19.229 - OTH PSYCHOACTIVE SUBSTANCE DEPENDENCE W INTOXICATION, UNSP  
F19.220 - OTH PSYCHOACTIVE SUBSTANCE DEPENDENCE W INTOXICATION, UNCOMP  
F19.222 - OTH PSYCHOACTV SUBSTANCE DEPEND W INTOX W PERCEPTUAL DISTURB  
F19.221 - OTH PSYCHOACTIVE SUBSTANCE DEPENDENCE W INTOX DELIRIUM  
F19.20 - OTHER PSYCHOACTIVE SUBSTANCE DEPENDENCE, UNCOMPLICATED  
F19.21 - OTHER PSYCHOACTIVE SUBSTANCE DEPENDENCE, IN REMISSION  
F19.22 - OTHER PSYCHOACTIVE SUBSTANCE DEPENDENCE WITH INTOXICATION  
F19.2 - OTHER PSYCHOACTIVE SUBSTANCE DEPENDENCE  
F19.19 - OTH PSYCHOACTIVE SUBSTANCE ABUSE W UNSP DISORDER  
F19.188 - OTH PSYCHOACTIVE SUBSTANCE ABUSE W OTH DISORDER  
F19.181 - OTH PSYCHOACTIVE SUBSTANCE ABUSE W SEXUAL DYSFUNCTION  
F19.180 - OTH PSYCHOACTIVE SUBSTANCE ABUSE W ANXIETY DISORDER  
F19.182 - OTH PSYCHOACTIVE SUBSTANCE ABUSE W SLEEP DISORDER  
F19.18 - OTH PSYCHOACTIVE SUBSTANCE ABUSE W OTH DISORDERS  
F19.159 - OTH PSYCHOACTIVE SUBSTANCE ABUSE W PSYCHOTIC DISORDER, UNSP  
F19.17 - OTH PSYCHOACTIVE SUBSTANCE ABUSE W PERSISTING DEMENTIA  
F19.16 - OTH PSYCHOACTV SUBSTANCE ABUSE W PERSIST AMNESTIC DISORDER  
F19.151 - OTH PSYCHOACTV SUBSTANCE ABUSE W PSYCH DISORDER W HALLUCIN  
F19.15 - OTH PSYCHOACTIVE SUBSTANCE ABUSE W PSYCHOTIC DISORDER  
F19.150 - OTH PSYCHOACTV SUBSTANCE ABUSE W PSYCH DISORDER W DELUSIONS  
F19.14 - OTH PSYCHOACTIVE SUBSTANCE ABUSE W MOOD DISORDER  
F19.129 - OTHER PSYCHOACTIVE SUBSTANCE ABUSE WITH INTOXICATION, UNSP  
F19.121 - OTH PSYCHOACTIVE SUBSTANCE ABUSE WITH INTOXICATION DELIRIUM  
F19.122 - OTH PSYCHOACTV SUBSTANCE ABUSE W INTOX W PERCEPTUAL DISTURB  
F19.12 - OTHER PSYCHOACTIVE SUBSTANCE ABUSE WITH INTOXICATION  
F19.120 - OTH PSYCHOACTIVE SUBSTANCE ABUSE W INTOXICATION, UNCOMP  
F19.1 - OTHER PSYCHOACTIVE SUBSTANCE ABUSE  
F19.10 - OTHER PSYCHOACTIVE SUBSTANCE ABUSE, UNCOMPLICATED  
F16.988 - HALLUCINOGEN USE, UNSP W OTH HALLUCINOGEN-INDUCED DISORDER  
F16.98 - HALLUCINOGEN USE, UNSP W OTH HALLUCINOGEN-INDUCED DISORDER  
F16.99 - HALLUCINOGEN USE, UNSP W UNSP HALLUCINOGEN-INDUCED DISORDER  
F16.983 - HALLUCIGN USE, UNSP W HALLUCIGN PERSIST PERCEPTION DISORDER  
F16.980 - HALLUCINOGEN USE, UNSP W ANXIETY DISORDER  
F16.950 - HALLUCINOGEN USE, UNSP W PSYCHOTIC DISORDER W DELUSIONS  
F16.951 - HALLUCINOGEN USE, UNSP W PSYCHOTIC DISORDER W HALLUCINATIONS  
F16.959 - HALLUCINOGEN USE, UNSP W PSYCHOTIC DISORDER, UNSP  
F16.94 - HALLUCINOGEN USE, UNSP W HALLUCINOGEN-INDUCED MOOD DISORDER  
F16.95 - HALLUCINOGEN USE, UNSP W PSYCHOTIC DISORDER  
F16.929 - HALLUCINOGEN USE, UNSPECIFIED WITH INTOXICATION, UNSPECIFIED  
F16.921 - HALLUCINOGEN USE, UNSP WITH INTOXICATION WITH DELIRIUM

F16.920 - HALLUCINOGEN USE, UNSP WITH INTOXICATION, UNCOMPLICATED

F16.92 - HALLUCINOGEN USE, UNSPECIFIED WITH INTOXICATION

F16.90 - HALLUCINOGEN USE, UNSPECIFIED, UNCOMPLICATED

F16.9 - HALLUCINOGEN USE, UNSPECIFIED
